# Supplementary material for: TiO2 nanofibres decorated with green-synthesized PAu/Ag@CQDs for the efficient photocatalytic degradation of organic dyes and pharmaceutical drugs
Source: Royal Society of Chemistry journal article supplement (doi:10.1039/c9ra10804a), 2020-01-01
Supplement: c9ra10804a1.pdf [file c9ra10804a1.pdf]

Electronic Supplementary Material (ESI)  
This journal is © The Royal Society of Chemistry

### Electronic Supplementary Information (ESI)

#### TiO<sub>2</sub> Nanofibres Decorated with Green Synthesized P<sub>Au/Ag</sub>@CQDs for Efficient Photocatalytic Degradation of Organic Dyes and Pharmaceutical Drugs

Anupma Thakur<sup>a,b</sup>, Praveen Kumar<sup>c,\*\*</sup>, Devinder Kaur<sup>b</sup>, Nagaraju Devunuri<sup>d</sup>, R.K. Sinha<sup>b</sup>, and Pooja Devi<sup>b,\*</sup>

<sup>a</sup>Academy of Scientific and Innovative Research (AcSIR), Ghaziabad-201002, India

<sup>b</sup>CSIR-Central Scientific Instruments Organisation, Sector-30 C, Chandigarh-160030, India

<sup>c</sup>School of Materials Science, Indian Association for the Cultivation of Science, Kolkata -700030, India

<sup>d</sup>Vignan's Foundation for Science, Technology & Research, Guntur, Andhra Pradesh – 522213, India

**ESI Table S1:** Literature reports on the use of CQDs as photosensitizers for dyes degradation applications

| Photocatalyst                         | Dye                     | % of Degradation | Time     | Ref. |
|---------------------------------------|-------------------------|------------------|----------|------|
| NCQDs/TiO <sub>2</sub>                | RhB                     | 95%              | 30min    | 1    |
| CQD/P-25                              | p-nitrophenol           | 89% - 96%        | 240min   | 2    |
| CQD/N-ZnO                             | MG, MB, fluorescein dye | 80%              | 30-45min | 3    |
| CQD/TiO <sub>2</sub>                  | MB                      | 100%             | 95min    | 4    |
| CQD/H-TiO <sub>2</sub>                | MO                      | 86%              | 25min    | 5    |
| TiO <sub>2</sub> /CQD                 | MB                      | 100%             | 45min    | 6    |
| CQD/N-ZnO                             | MG                      | 100%             | 30min    | 7    |
| CQD-ZnO                               | RhB                     | 100%             | 175min   | 8    |
| TiO <sub>2</sub> -CQDs                | RhB                     | 100%             | 75min    | 9    |
| CQD/BiOCl                             | RhB, Bisphenol          | 91%              | 120min   | 10   |
| N-CD/TiO <sub>2</sub> IOS             | MB                      | 97.1%            | 50min    | 11   |
| CD/CuWO <sub>4</sub>                  | RhB                     | 88.09%           | 1.2hr    | 12   |
| CQD/meso-Ti-450                       | MB                      | 98%              | 1hr      | 13   |
| CQD/BiO <sub>x</sub> (X=Cl,Br)        | RhB                     | 100%             | 30min    | 14   |
| ZnO/CQD                               | RhB                     | 83%              | 105min   | 15   |
| CD/g-C <sub>3</sub> N <sub>4</sub>    | RhB                     | 100%             | 240min   | 16   |
| NCQD/TiO <sub>2</sub>                 | MB                      | 86.9%            | 420min   | 17   |
| CQD/N-ZnO                             | MG                      | 99%              | 30min    | 18   |
| CD/TiO <sub>2</sub> -600              | MB                      | 71%              | 120min   | 19   |
| CQD/Ag <sub>3</sub> PO <sub>4</sub>   | MB                      | 100%             | 70min    | 20   |
| NCQDs/Ag <sub>3</sub> PO <sub>4</sub> | MO                      | 98%              | 18min    | 21   |

Figure S 1: Research trends in photocatalytic degradation of pharmaceutical drugs focusing on UV-Visible photocatalysts.

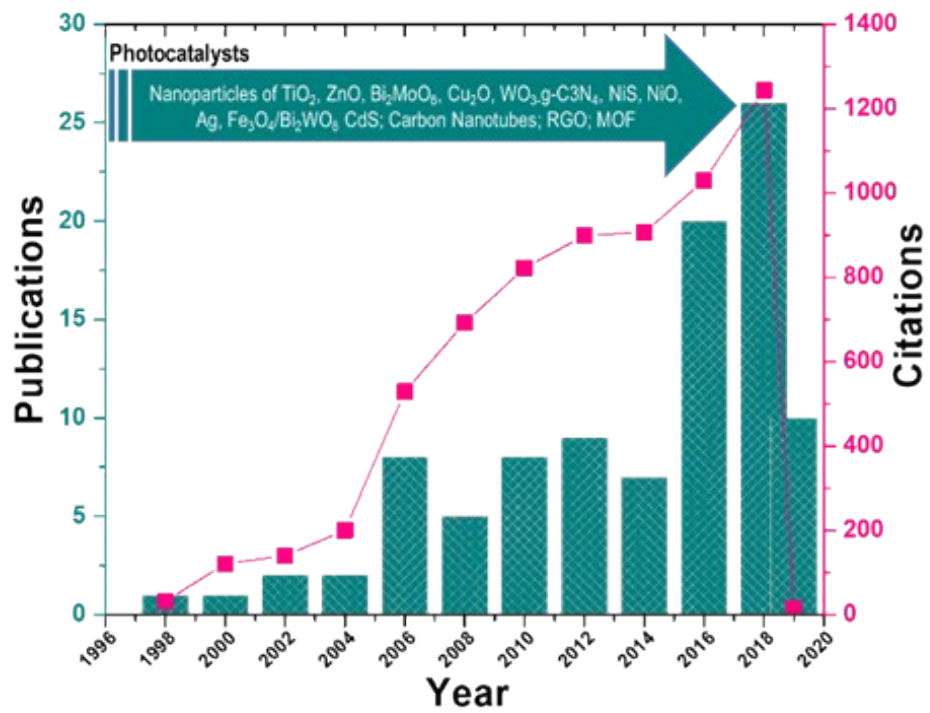

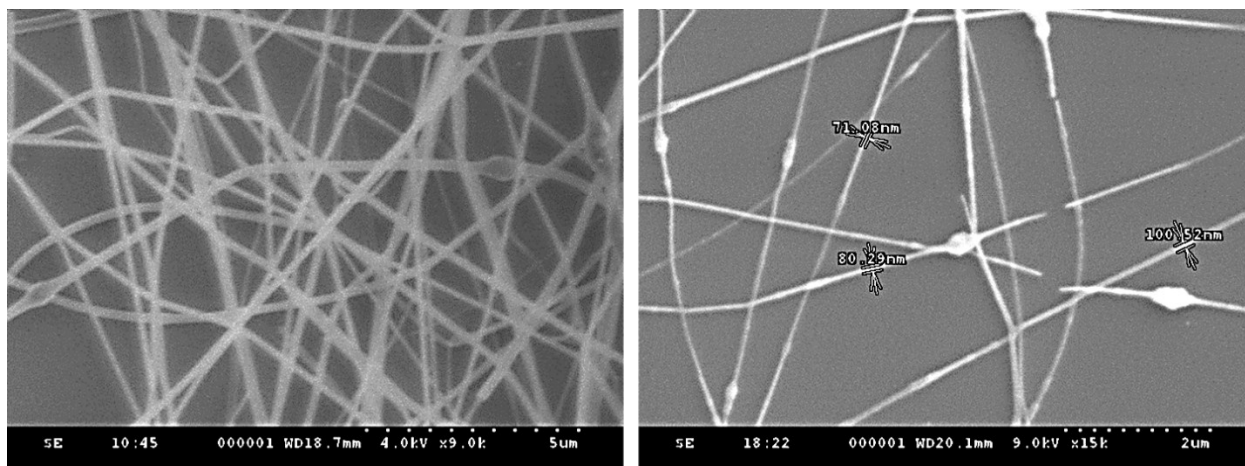

Figure S2: SEM of fibrous TiO<sub>2</sub> nanostructures

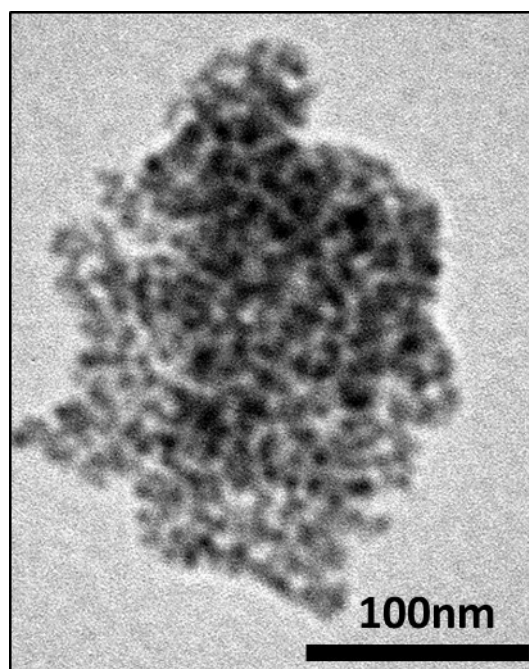

Figure S3: TEM of fibrous  $P_M$ -CQDs (where M: Au and Ag) decorated  $TiO_2$  nanofibers

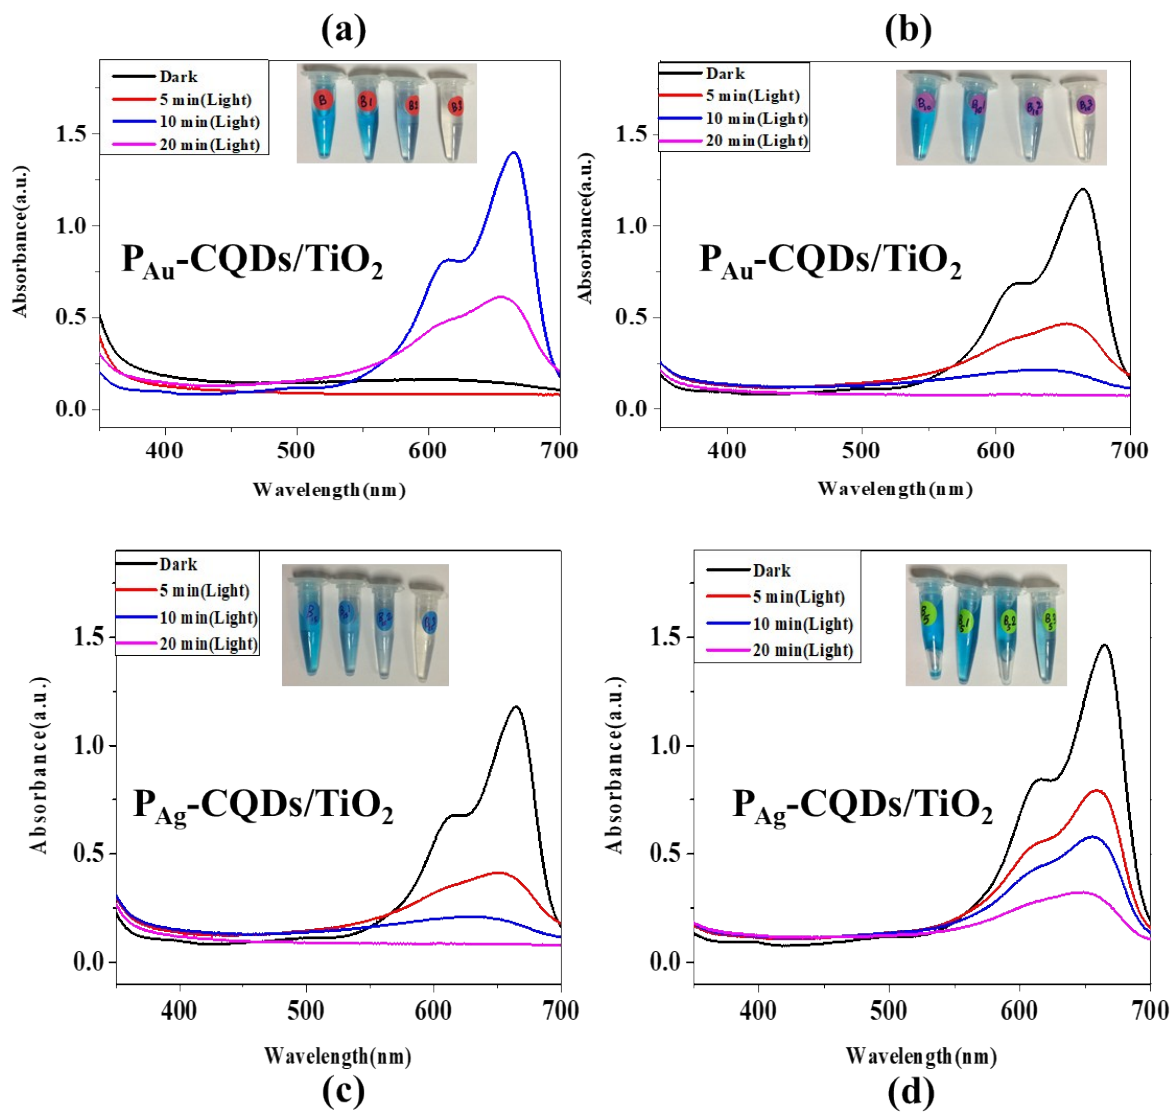

**Figure S4:** UV-Vis absorption spectra of MB dye (10 ppm) suspension in the presence of the different loading concentrations i.e. 1 mg/mL and 0.5 mg/mL, of the  $P_{Au}$ -CQDs/ $TiO_2$  and  $P_{Ag}$ -CQDs/ $TiO_2$  catalyst, respectively.

**Figure S5:** Effect of MB dye concentration, i.e. (a) 1 ppm, and (b) 20 ppm, on the optimized  $P_{Au}$ -CQDs/ $TiO_2$  photocatalyst concentration as a function of irradiation time.

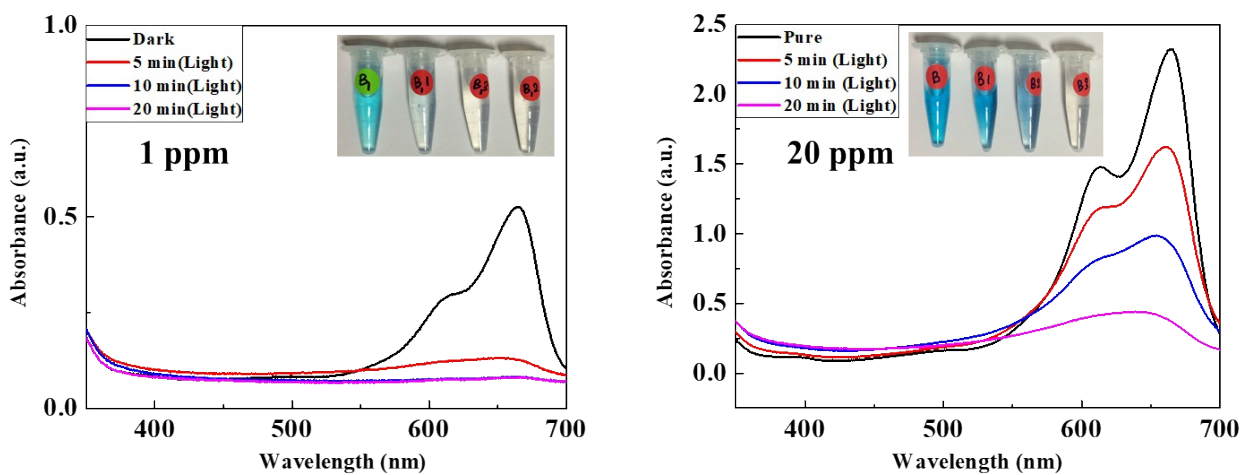

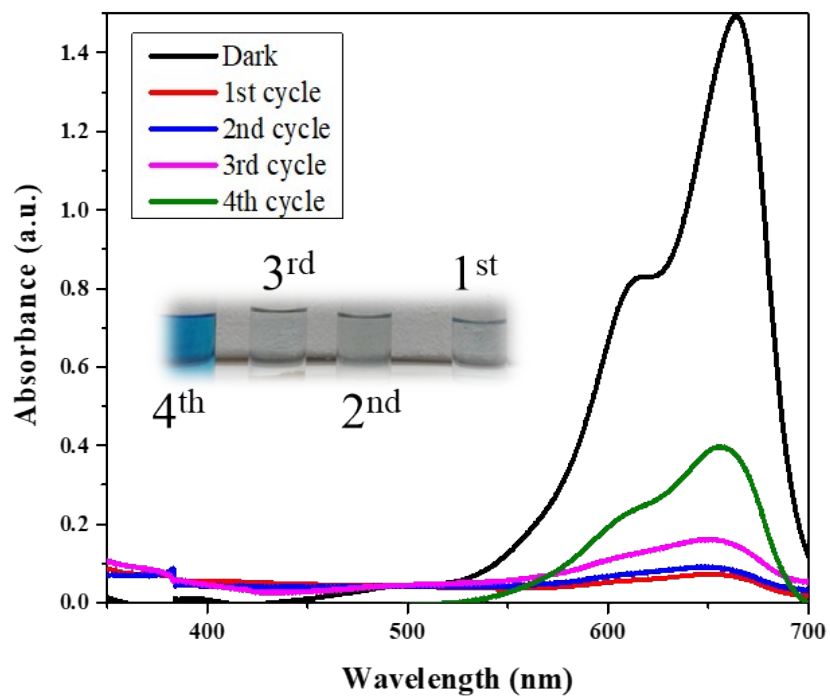

Figure S 6: Reusability of the P<sub>Au</sub>-CQDs/TiO<sub>2</sub> photocatalyst.

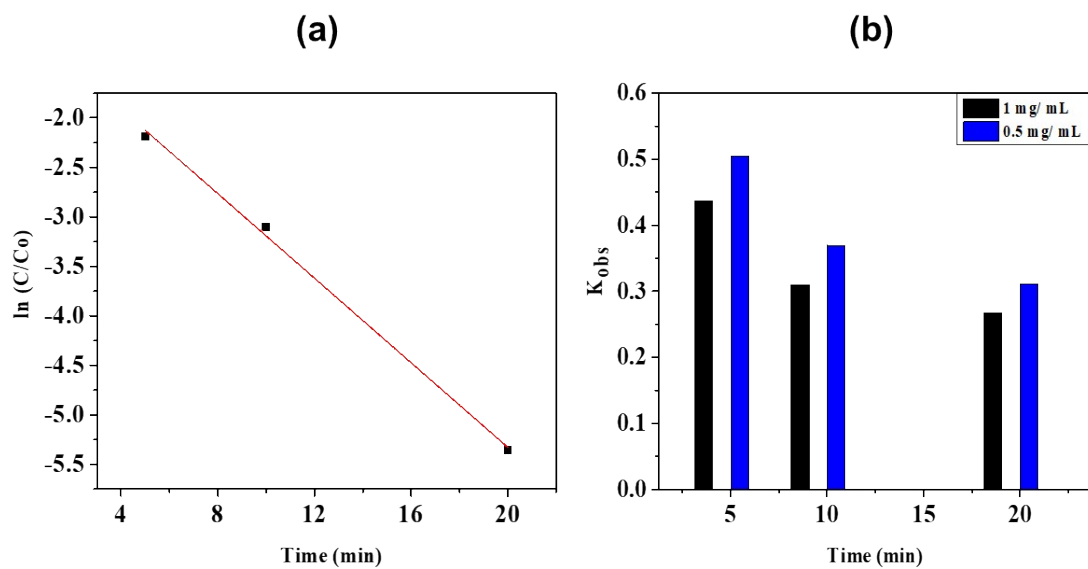

Figure S 7: Pseudo first-order kinetic model representing (a) kinetics and (b) effect of catalyst concentration on MB dye degradation.

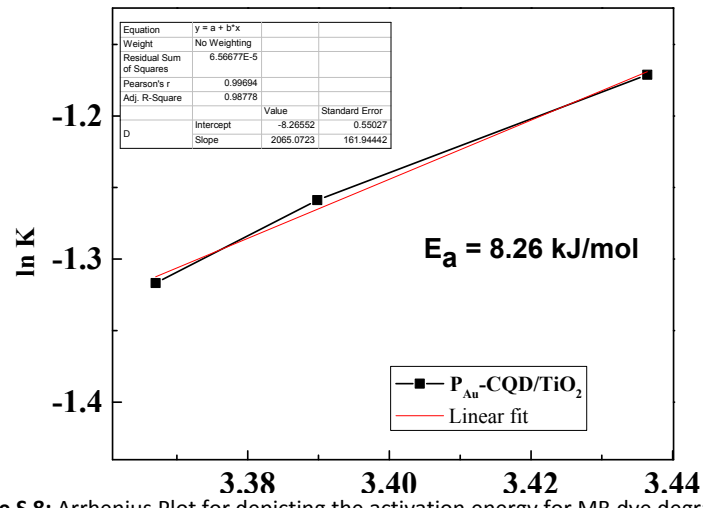

Figure S 8: Arrhenius Plot for depicting the activation energy for MB dye degradation

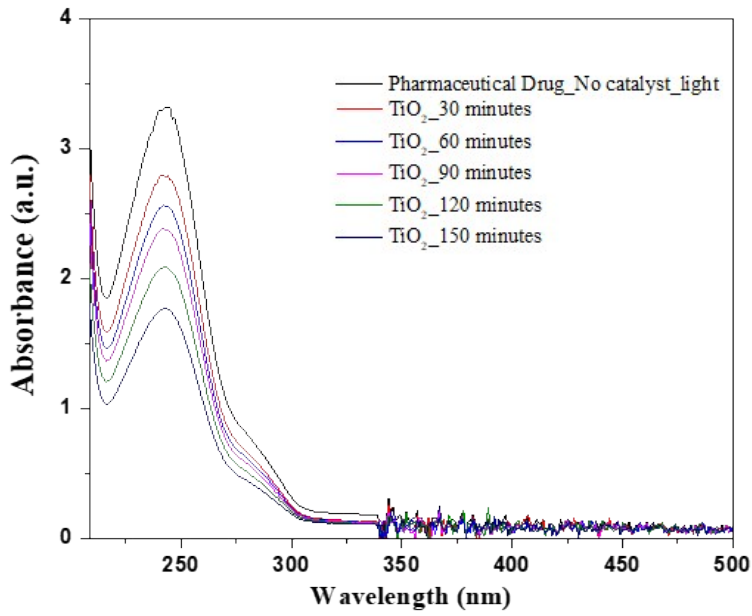

Figure S 9:  $\text{TiO}_2$  nanofibers response as photocatalyst for pharmaceutical drug degradation



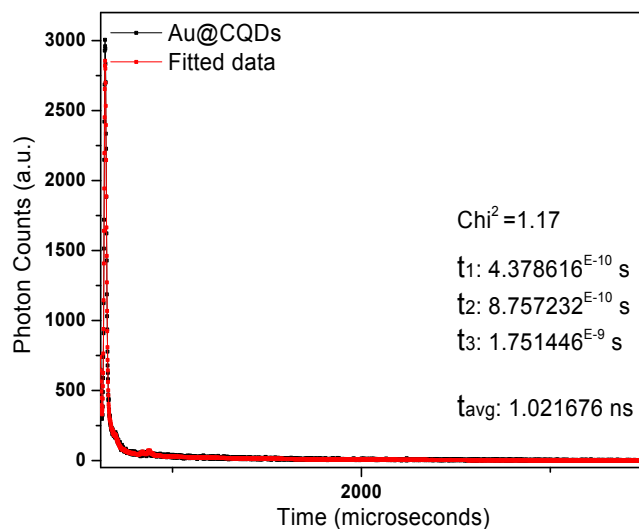

Figure S 10: Time-dependent photoluminescence spectra of P<sub>Au</sub>@CQDs

## References

1. Y.-Q. Zhang, D.-K. Ma, Y.-G. Zhang, W. Chen and S.-M. Huang, *Nano Energy*, 2013, **2**, 545-552.
2. F. Zheng, Z. Wang, J. Chen and S. Li, *RSC Advances*, 2014, **4**, 30605-30609.
3. S. Muthulingam, I.-H. Lee and P. Uthirakumar, *Journal of colloid and interface science*, 2015, **455**, 101-109.
4. P. S. Saud, B. Pant, A.-M. Alam, Z. K. Ghouri, M. Park and H.-Y. Kim, *Ceramics International*, 2015, **41**, 11953-11959.
5. J. Tian, Y. Leng, Z. Zhao, Y. Xia, Y. Sang, P. Hao, J. Zhan, M. Li and H. Liu, *Nano Energy*, 2015, **11**, 419-427.
6. N. A. Travlou, M. Algarra, C. Alcoholado, M. Cifuentes-Rueda, A. M. Labella, J. M. Lázaro-Martínez, E. Rodríguez-Castellón and T. J. Badosz, *ACS Applied Bio Materials*, 2018, **1**, 693-707.
7. S. Muthulingam, K. B. Bae, R. Khan, I.-H. Lee and P. Uthirakumar, *RSC Advances*, 2015, **5**, 46247-46251.
8. X.-Y. Zhang, J.-K. Liu, J.-D. Wang and X.-H. Yang, *Industrial & Engineering Chemistry Research*, 2015, **54**, 1766-1772.
9. W. Wang, Y. Ni and Z. Xu, *Journal of Alloys and Compounds*, 2015, **622**, 303-308.
10. J. Di, J. Xia, M. Ji, B. Wang, S. Yin, Q. Zhang, Z. Chen and H. Li, *ACS applied materials & interfaces*, 2015, **7**, 20111-20123.
11. W. Zhang, X. Zhang, Z. Zhang, W. Wang, A. Xie, C. Xiao, H. Zhang and Y. Shen, *Journal of the Electrochemical Society*, 2015, **162**, H638-H644.
12. P. ReddyPrasad and E. B. Naidoo, *Journal of Molecular Structure*, 2015, **1098**, 146-152.
13. R. Miao, Z. Luo, W. Zhong, S.-Y. Chen, T. Jiang, B. Dutta, Y. Nasr, Y. Zhang and S. L. Suib, *Applied Catalysis B: Environmental*, 2016, **189**, 26-38.

14. J. Xia, J. Di, H. Li, H. Xu, H. Li and S. Guo, *Applied Catalysis B: Environmental*, 2016, **181**, 260-269.
15. H. Bozetine, Q. Wang, A. Barras, M. Li, T. Hadjersi, S. Szunerits and R. Boukherroub, *Journal of colloid and interface science*, 2016, **465**, 286-294.
16. S. Fang, Y. Xia, K. Lv, Q. Li, J. Sun and M. Li, *Applied Catalysis B: Environmental*, 2016, **185**, 225-232.
17. J. Zhang, X. Zhang, S. Dong, X. Zhou and S. Dong, *Journal of Photochemistry and Photobiology A: Chemistry*, 2016, **325**, 104-110.
18. S. Muthulingam, K. B. Bae, R. Khan, I.-H. Lee and P. Uthirakumar, *Journal of environmental chemical engineering*, 2016, **4**, 1148-1155.
19. Y. Hou, Q. Lu, H. Wang, H. Li, Y. Zhang and S. Zhang, *Materials Letters*, 2016, **173**, 13-17.
20. H. Zhang, H. Huang, H. Ming, H. Li, L. Zhang, Y. Liu and Z. Kang, *Journal of Materials Chemistry*, 2012, **22**, 10501-10506.
21. C. Zhu, Y. Zhao, L. Fang, J. Zheng, P. Hu, Y. Liu, X. Cao, Z. Chen, W. Wu and M. Wu, *Materials Letters*, 2017, **188**, 304-307.
